# Supplementary material for: MDA5-autoimmunity and Interstitial Pneumonitis Contemporaneous with the COVID-19 Pandemic (MIP-C)
Source: bioRxiv or medRxiv preprint supplement (doi:10.1101/2023.11.03.23297727), 2023-11-05
Supplement: Supplementary file [file media-3.pdf]

## SUPPLEMENTARY ONLINE MATERIALS

589  
590

### 591 MDA5-autoimmunity and Interstitial Pneumonitis Contemporaneous with the COVID- 592 19 Pandemic (MIP-C)

593

#### 594 Authors

595 Khizer Iqbal\*<sup>1</sup>, Saptarshi Sinha\*<sup>2</sup>, Paula David\*<sup>1</sup>, Gabriele De Marco<sup>3, 4, 5</sup>, Sahar Taheri<sup>6</sup>, Ella  
596 McLaren<sup>2</sup>, Sheetal Maisuria<sup>4</sup>, Gururaj Arumugakani<sup>7, 8</sup>, Zoe Ash<sup>9</sup>, Catrin Buckley<sup>1</sup>, Lauren Coles<sup>1</sup>,  
597 Chamila Hettiarachchi<sup>3</sup>, Gayle Smithson<sup>3</sup>, Maria Slade<sup>3</sup>, Rahul Shah<sup>1</sup>, Helena Marzo-Ortega<sup>4</sup>,  
598 Mansoor Keen<sup>9</sup>, Catherine Lawson<sup>10</sup>, Joanna Mclorinan<sup>1</sup>, Sharmin Nizam<sup>3</sup>, Hanu Reddy<sup>11</sup>, Omer  
599 Sharif<sup>12</sup>, Shabina Sultan<sup>11</sup>, Gui Tran<sup>10</sup>, Mark Wood<sup>1</sup>, Samuel Wood<sup>1</sup>, Pradipta Ghosh<sup>2, 13‡</sup>, Dennis  
600 McGonagle<sup>1,4‡</sup>

601

602 \*These authors contributed Equally as first author

603

#### 604 Affiliations

605 <sup>1</sup>Leeds Teaching Hospitals NHS Trust, Rheumatology Department, Leeds, United Kingdom. <sup>2</sup>Department of Cellular and  
606 Molecular Medicine, School of Medicine, University of California San Diego, La Jolla, CA, 92093, USA. <sup>3</sup>Mid Yorkshire  
607 Teaching NHS Trust, Rheumatology, Wakefield, United Kingdom <sup>4</sup>University of Leeds, Leeds Institute of Rheumatic and  
608 Musculoskeletal Medicine, Leeds, United Kingdom. <sup>5</sup>NIHR Leeds Biomedical Research Centre, Leeds Teaching Hospitals  
609 NHS Trust, Leeds, United Kingdom. <sup>6</sup> Department of Computer Science and Engineering, Jacob's School of Engineering,  
610 University of California San Diego, La Jolla, CA. 92093, USA. <sup>7</sup>Leeds Teaching Hospitals NHS Trust, Pathology, Leeds, United  
611 Kingdom, <sup>8</sup>University of Leeds, Immunology, Leeds, United Kingdom. <sup>9</sup>Bradford Teaching Hospitals NHS Foundation Trust,  
612 Rheumatology, Bradford, United Kingdom. <sup>10</sup>Harrogate and District NHS Foundation Trust, Rheumatology, Harrogate,  
613 United Kingdom. <sup>11</sup>Airedale NHS Foundation Trust, Rheumatology, Steeton with Eastburn, United Kingdom. <sup>12</sup>Calderdale  
614 and Huddersfield NHS Foundation Trust, Rheumatology, Huddersfield and Halifax, United Kingdom. <sup>13</sup>Department of  
615 Medicine, School of Medicine, and Veterans Affairs Medical Center, University of University of California San Diego, La  
616 Jolla, CA. 92093, USA.

617

618

#### 619 ‡Corresponding Authors:

620 Dennis McGonagle PhD FRCPI

621 Leeds Teaching Hospitals NHS Trust, Rheumatology Department, Leeds, United Kingdom | University  
622 of Leeds, Leeds Institute of Rheumatic and Musculoskeletal Medicine, Leeds, United Kingdom |

623 Email: [d.g.mcgonagle@leeds.ac.uk](mailto:d.g.mcgonagle@leeds.ac.uk)

624

625 Pradipta Ghosh, M.D.

626 Professor, Departments of Medicine and Cellular and Molecular Medicine, University of California  
627 San Diego; 9500 Gilman Drive (MC 0651), George E. Palade Bldg, Rm 232, 239; La Jolla, CA 92093,  
628 USA | Phone: 858-822-7633 | Email: [prghosh@ucsd.edu](mailto:prghosh@ucsd.edu)

629 **INVENTORY OF SUPPLEMENTARY MATERIALS**

- 630 • Supplementary Figures (2)
- 631 • Supplemental Tables (2)
- 632 • Supplementary Information (2). These are uploaded separately as excel datasheets

633

### Supplementary figures

634 Supplementary figure 1

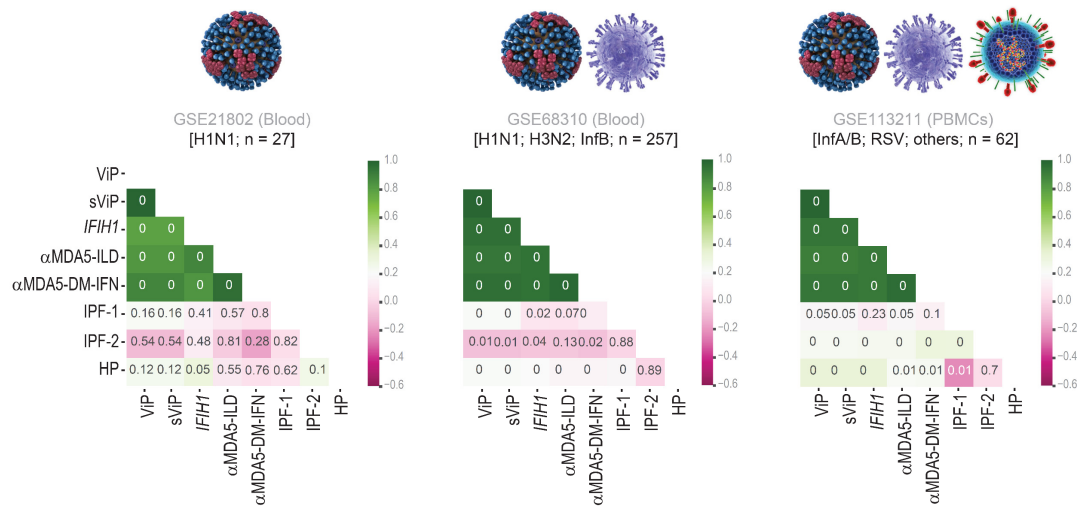

635

636

637 **Supplementary Figure 1: [Related to Figure 4]**

638 **Induction of *IFIH1* in respiratory viral pandemics correlates with the induction of Type 1-centric cytokine storm and α-**  
 639 **MDA5-ILD risk signatures in whole blood and PBMCs.** Graphical representation of a correlation matrix representing the  
 640 pair-wise correlation between multiple variables, i.e., composite scores of different gene signatures elaborated in **Figure**  
 641 **4A.** The colour key spans from -1 (magenta) to 1 (green), indicating both strength and direction of correlation. Numbers  
 642 within the heatmap indicate statistical significance (only significant *p values* are displayed).

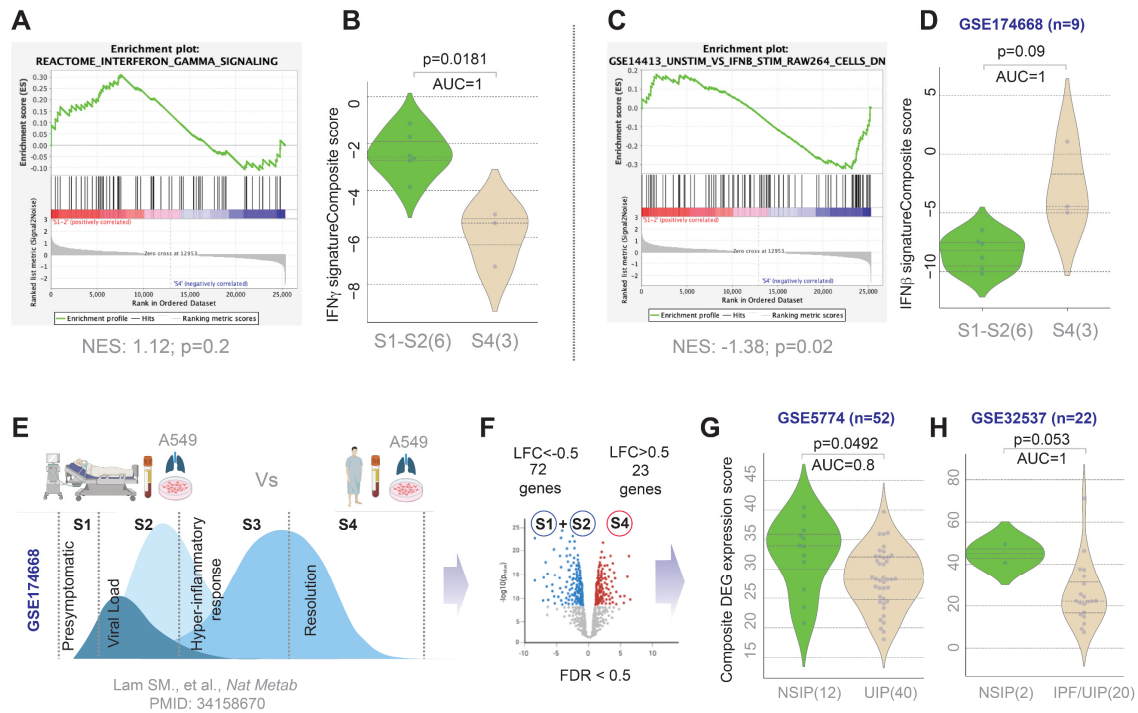

644

645

646 **Supplementary Figure 2: [Related to Figure 6]**

647 **Serum derived exosomes from convalescent patients with CoV induce a Type 1-centric immunophenotype that is**  
 648 **induced also in the lung tissues from non-specific interstitial pneumonitis (NSIP).**

649 A-D. Gene Set Enrichment Analyses (GSEA pre-ranked analysis) of Type 1 and 2 interferon response derived from MSigDB  
 650 demonstrate the differential activation of these interferons in lung epithelial cells exposed to exosome vesicles from the  
 651 serum of early (A-B) and late (C-D) stages of COVID-19 infection.

652 E-F. Schematic in panel E shows the workflow for the derivation of differentially expressed genes (DEGs; panel F) in lung  
 653 epithelial cells exposed to exposed to exosome vesicles from the serum of early (S1-2) and late (S4) stages of COVID-19  
 654 infection.

655 G. Violin plots display the composite score of the DEGs (used as a gene signature) in two independent transcriptomic  
 656 datasets of lung tissues from subjects with undefined (UIP) or non-specific (NSIP) interstitial pneumonitis and non-diseased  
 657 controls.

658

Supplemental Table 1- MDA5 Related ILD Patterns

| Gender, age (age range) | ethnicity       | past history of autoimmunity | COVID19 vaccination (first dose) | COVID19 infection status            | Non-clinical ILD features                                                                       | Baseline CK | ANA IIF  | Other myositis Ab | Imaging                                                                                                                                      | Treatment                                                                                                                                  | Treatment outcome        |
|-------------------------|-----------------|------------------------------|----------------------------------|-------------------------------------|-------------------------------------------------------------------------------------------------|-------------|----------|-------------------|----------------------------------------------------------------------------------------------------------------------------------------------|--------------------------------------------------------------------------------------------------------------------------------------------|--------------------------|
| Male, (45-49)           | white-british   | nil                          | 7 months after, no flare         | not known                           | proximal muscle weakness, inflammatory arthritis, cutaneous features (ex. Gottron's)            | 304         | negative | anti-PL7+         | Chest CT with pulmonary fibrosis and ground glass in the bases, pattern consistent with ILD                                                  | MTX (2020, for arthritis), IVIg (during septic arthritis), MMF (nonresponse), cyclophosphamide pulses, HCQ (stopped due to retinal damage) | progressive lung disease |
| Male, (85-89)           | white-british   | nil                          | 3 months after, no flare         | 10 months after, no flare           | none                                                                                            | 178         | negative | anti-SAE1         | Chest CT with NSIP pulmonary fibrosis picture                                                                                                | nintenamib                                                                                                                                 | progressive lung disease |
| Female, (50-54)         | white-british   | nil                          | 2 months after, no flare         | not known                           | heliotrop rash, shwal, gottren's, synovitis                                                     | 92          | positive | none              | Chest CT initially normal but after a year central mid and upper zone ill defined areas of ground glass opacification, no pulmonary fibrosis | MTX, prednisolone, nifedipine                                                                                                              | stable lung disease      |
| Female, (65-69)         | n/a             | nil                          | 4 months before                  | 1 year and 4 months after, no flare | raynaud                                                                                         | 149         | positive | none              | Chest CT with NSIP pattern pulmonary fibrosis                                                                                                | Rituximab, MMF, cyclophosphamide pulse then MMF again                                                                                      | died (ILD)               |
| Female, (60-64)         | white-british   | Hypothyroidism?              | 2 months after, no flare         | not known                           | none (possibly synovitis)                                                                       | 71          | negative | anti-TIFFgamma    | Chest-CT with co-existing pulmonary fibrosis and emphysema (smoker)                                                                          | nintenamib                                                                                                                                 | progressive lung disease |
| Male, (40-44)           | any other Asian | nil                          | not vaccinated                   | not known                           | synovitis, possibly gotttron's, possibly heliotropic, slightly proximal weakness in upper limbs | 47          | negative | anti-Ro52         | CT angiogram pulmonary - negative for PE, but bilateral ground glass changes                                                                 | 3x doses IV methylprednisolone and then oral prednisolone, IV cyclophosphamide, 5 days of IVIG, tacrolimus and HCL, Rituximab              | died (ILD)               |
| Male, (60-64)           | white-british   | nil                          | 2 weeks before                   | not known                           | none                                                                                            | 33          | positive | anti-SAE1         | Most recent chest CT with progressive interstitial lung changes with new ground glass opacification and                                      | methylprednisolone IV                                                                                                                      | died (ILD)               |

|                 |                      |                 |                        |                                     |                                                                 |     |          |                     |                                                                                                                                                                                                                      |                                                                                                |                     |
|-----------------|----------------------|-----------------|------------------------|-------------------------------------|-----------------------------------------------------------------|-----|----------|---------------------|----------------------------------------------------------------------------------------------------------------------------------------------------------------------------------------------------------------------|------------------------------------------------------------------------------------------------|---------------------|
|                 |                      |                 |                        |                                     |                                                                 |     |          |                     | pulmonary fibrosis, new bilateral effusions                                                                                                                                                                          |                                                                                                |                     |
| Female, (30-34) | white-british        | nil             | 11 months before       | not known                           | mechanic hands                                                  | 52  | positive | anti-SAE1           | Most recent chest CT when compared to exam performed six months before, there were new areas of ground-glass changes/consolidation (both centrally and peripherally) in the upper lobes bilaterally and middle lobe. | methylprednisolone IV, cyclophosphamide, Rituximab, MMF                                        | died (ILD)          |
| Female, (55-59) | "other ethnic group" | nil             | 3 months before        | 1 year and 8 months after, no flare | mechanic hands, SLE overlap                                     | 105 | positive | Anti-SAE1, Anti-SRP | Chest CT with upper lobe pulmonary fibrosis and ground glass appearance compatible with ILD                                                                                                                          | long term steroids, cyclophosphamide, rituximab, azathioprine (intolerant, stopped), MMF, IVIg | stable lung disease |
| Female, (70-74) | white-british        | nil             | 1 day after            | not known                           | none                                                            | 29  | positive | none                | Chest CT with significant amount of ground glass change with subpleural sparing, compatible with NSIP                                                                                                                | none (waiting on tests to differentiate from hypersensitivity)                                 | died (ILD)          |
| Female, (60-64) | white-british        | Grave's disease | 5 months before        | 10 months before, flared            | raynaud                                                         | 78  | negative | none                | Chest CT with upper lobe fibrosis with honeycombing                                                                                                                                                                  | none                                                                                           | stable lung disease |
| Female, (75-79) | white-british        | hypothyroidism? | 5 months after, flared | not known                           | sicca symptoms                                                  | 50  | negative | Anti-SAE1           | Chest CT with UIP fibrosis                                                                                                                                                                                           | none                                                                                           | stable lung disease |
| Male, (35-39)   | Pakistani            | nil             | not vaccinated         | not known                           | cutaneous rash (gottron's papules, facial malar/abdominal rash) | 299 | positive | none                | Chest CT with pneumopericardium and mediastinum with multifocal consolidation and ground glass changes alongside with traction bronchiectasis                                                                        | methylprednisolone IV, IVIg, cyclophosphamide                                                  | died (ILD)          |
| Female, (10-14) | Pakistani            | nil             | not vaccinated         | 1 year and 3 months before          | inflammatory arthritis, sclerodermatous skin and calcinosis     | 105 | positive | anti-Ro52           | Chest CT with some pulmonary fibrosis                                                                                                                                                                                | azathioprine, MMF, Rituximab, IVIg, sodium thiosulphate, HCO, prednisolone                     | stable lung disease |
| Female, (50-54) | n/a                  | nil             | not vaccinated         | not known                           | none                                                            | n/a | negative | anti-SAE1           | Chest CT with round glass changes with traction of the airways                                                                                                                                                       | none (waiting on tests)                                                                        | died (ILD)          |

|                 |               |     |                            |                        |                                                                                   |     |          |                                     |                                                                                                                                                               |                                                                     |                                                                |
|-----------------|---------------|-----|----------------------------|------------------------|-----------------------------------------------------------------------------------|-----|----------|-------------------------------------|---------------------------------------------------------------------------------------------------------------------------------------------------------------|---------------------------------------------------------------------|----------------------------------------------------------------|
|                 |               |     |                            |                        |                                                                                   |     |          |                                     | just patchy and geographical and worse at the bases (not NSIP pattern, could be CTD-ILD)                                                                      |                                                                     |                                                                |
| Female, (50-54) | not given     | nil | 3 months before            | 2 months after, flared | periorbital rash, also in upper arm and wrists                                    | n/a | negative | anti-PL7+, anti-Ro52, anti-PSc100   | Chest CT with ground glass changes compatible with ILD                                                                                                        | cyclophosphamide, steroids, MMF                                     | stable lung disease                                            |
| Male, (70-74)   | white-british | nil | 8 months before            | not known              | none                                                                              | 47  | negative | anti-SAE1                           | Chest CT with mild fibrosis, interstitial changes and subtle sub-pleural abnormalities                                                                        | none                                                                | stable lung disease                                            |
| Male, (80-84)   | not given     | nil | 1 year and 5 months before | not known              | none                                                                              | 68  | positive | none                                | Chest CT with bilateral mainly peripheral and basal fibrosis with ground glass changes and bronchiectasis                                                     | none                                                                | stable lung disease                                            |
| Male, (85-89)   | white-british | nil | 1 year and 8 months before | not known              | none                                                                              | 63  | negative | anti-PL2, anti-SRP, anti-Mi-2-alpha | Chest CT showing fibrosis, emphysema and true lower lobe bronchiectasis                                                                                       | none                                                                | stable lung disease                                            |
| Male, (50-54)   | Pakistani     | nil | 6 months before            | not known              | none                                                                              | 136 | positive | none                                | Chest CT showing extensive patchy bilateral ground glass changes, bronchiectasis                                                                              | steroids, to start nintedanib                                       | progressive lung disease                                       |
| Male, (70-74)   | white-british | nil | 1 year before              | 1 year before          | none                                                                              | 116 | positive | none                                | Chest CT showing pulmonary fibrosis and nodules                                                                                                               | none                                                                | stable lung disease                                            |
| Male, (55-59)   | n/a           | nil | 1 week before              | not known              | hemoptysis (self-resolved)                                                        | n/a | positive | anti-Ro52                           | n/a                                                                                                                                                           | n/a                                                                 | n/a                                                            |
| Female, (70-74) | n/a           | nil | 1 year and 8 months before | not known              | raynaud, synovitis, rashes                                                        | n/a | positive | anti-PMScl100 and anti-PMScl70      | Chest CT with usual UIP                                                                                                                                       | MTX                                                                 | stable lung disease                                            |
| Male, (30-34)   | n/a           | nil | not vaccinated             | 5 days before          | mild synovitis, stiffness and weakness with power reduced in lower limbs and some | 27  | positive | none                                | Chest CT scan 2 months prior to admission demonstrated bilateral peripheral ground glass change in both lungs. In admission progression of changes compatible | steroids, cyclophosphamide, rituximab, tofacitinib, plasma exchange | initial partial response but than progressive disease and died |

|                                                                                                                                                                                                                                                                                                                                                                                                                                                   |     |     |                                   |           |                         |     |          |      |                                     |      |                        |
|---------------------------------------------------------------------------------------------------------------------------------------------------------------------------------------------------------------------------------------------------------------------------------------------------------------------------------------------------------------------------------------------------------------------------------------------------|-----|-----|-----------------------------------|-----------|-------------------------|-----|----------|------|-------------------------------------|------|------------------------|
|                                                                                                                                                                                                                                                                                                                                                                                                                                                   |     |     |                                   |           | breathlessness,<br>rash |     |          |      | with rapid progressive<br>ILD.      |      |                        |
| Male,<br>(70-74)                                                                                                                                                                                                                                                                                                                                                                                                                                  | n/a | nil | 1 year and<br>10 months<br>before | not known | none                    | 206 | positive | none | CT with non-typical ILD<br>findings | none | stable lung<br>disease |
| <b>ILD = Interstitial Lung Disease; CK = Creatin-Kinase; ANA IIF = Anti-Nuclear Antibodies Indirect ImmunoFluorescence; N/A = Not Available; CT = Computer Tomography scan; CTD = connective tissue disease; UIP = Usual Interstitial Pneumonia IV = Intra-Venous; MMF = Mophetyl Mychophenolate; MTX = Methotrexate, HCQ = HydroxyChloroQuine; IVIg = IV Immunoglobulins; not known for COVID-19 infection status considered when not tested</b> |     |     |                                   |           |                         |     |          |      |                                     |      |                        |

660

661



662 Supplemental Table 2: Characteristics of Non-ILD patients

| Gender, age (age range) | ethnicity       | past history of autoimmunity | COVID-19 vaccine status                    | COVID-19 infection before (how long) | Non-clinical ILD features                                                                                                                                    | Baseline CK | ANA IIF  | Other myositis Ab                                                                                     | Relevant Imaging                          | Treatment                    | Treatment outcome |
|-------------------------|-----------------|------------------------------|--------------------------------------------|--------------------------------------|--------------------------------------------------------------------------------------------------------------------------------------------------------------|-------------|----------|-------------------------------------------------------------------------------------------------------|-------------------------------------------|------------------------------|-------------------|
| Female, (35-39)         | any other Asian | nil                          | 1 month after, no flare                    | not known                            | Symmetrical proximal myositis, gottrons's papules, photosensitivity, inflammatory arthritis                                                                  | 123         | positive | none                                                                                                  | proximal myositis in femur MRI            | prednisolone, MTX            | partial response  |
| Male, (45-49)           | white-British   | nil                          | 1 year and 9 months after, cutaneous flare | 11 months after, no flare            | overlap connective tissue disease with dermatomyositis and systemic sclerosis (Raynaud's, synovitis, cutaneous ulcers, dermatomyositis rash and mouth ulcer) | 89          | negative | none, but SCL70                                                                                       | n/a                                       | rituximab, HCO, MMF, PPI     | improvement       |
| Male, (50-54)           | any other Asian | nil                          | 1 year after, no flare                     | 11 months before                     | right tight myositis                                                                                                                                         | 33          | negative | AntiRO52, antiIOJ, anti-PL7, Anti-PM-Scl75, anti-KU, Anti SAE1, anti NXP2, anti-TIF1, anti MI-2 alpha | MRI and US thigh normal muscle appearance | none                         | total improvement |
| Female, (80-84)         | white-British   | nil                          | 1 week after, flare? Trigger?              | not known                            | Raynaud, non-myositis                                                                                                                                        | 126         | positive | none                                                                                                  | none                                      | nifedipine                   | improvement       |
| Female, (50-54)         | white-Irish     | nil                          | 5 months before                            | not known                            | proximal myopathy                                                                                                                                            | 280         | positive | none                                                                                                  | Thigh MRI compatible with myositis        | MMF, prednisolone, rituximab | improvement       |
| Male, (45-49)           | white-British   | sarcoidosis?                 | 2 months after, no flare                   | not known                            | Raynaud, periungal changes, non-myositis                                                                                                                     | 481         | negative | anti-SAE1                                                                                             | none                                      | none                         | stable            |

|                 |                 |                                                                   |                                      |                                       |                                                                                                               |     |          |                                                    |                                                           |                                              |                  |
|-----------------|-----------------|-------------------------------------------------------------------|--------------------------------------|---------------------------------------|---------------------------------------------------------------------------------------------------------------|-----|----------|----------------------------------------------------|-----------------------------------------------------------|----------------------------------------------|------------------|
| Female, (55-59) | white-British   | nil                                                               | 3 months before                      | not known                             | Raynaud, synovitis                                                                                            | 66  | positive | anti-Ro52                                          | none                                                      | nifedipine                                   | progression      |
| Female, (75-79) | white-British   | nil                                                               | 3 months before                      | 2 months before                       | neck pain, progressive breathlessness                                                                         | 220 | positive | anti-PMScl100                                      | Chest CT with no ILD, no evidence of myositis in neck MRI | none                                         | stable           |
| Female, (25-29) | N/A             | nil                                                               | 6 days before                        | not known                             | Raynaud                                                                                                       | 62  | positive | none                                               | none                                                      | none                                         | stable           |
| Female, (40-44) | black-Caribbean | nil                                                               | not vaccinated                       | not known                             | inflammatory arthritis, Raynaud, two miscarriages (APL negatives)                                             | 63  | negative | anti-Ro52, anti-PL7, anti PSc100                   | none                                                      | MTX, steroids, HCO, azathioprine             | no response      |
| Male, (70-74)   | N/A             | nil                                                               | 1 year and 6 months before           | not known                             | haemoptysis and haematuria                                                                                    | n/a | positive | anti-PL7, anti SAE1, anti-ku, anti NXP2, anti-Ro52 | Chest CT with no ILD                                      | none                                         | improvement      |
| Female, (35-39) | Pakistani       | SLE                                                               | 2 years and 5 months after, no flare | 2 years and 10 months after, no flare | nail fold abnormalities, leukopenia, panniculitis, malar rash, heliotrope rash, digital maculopathy, myositis | 33  | negative | none                                               | signs of myositis in MRI of proximal inferior limbs       | prednisolone, HCO, MMF and 1 cycle rituximab | partial response |
| Male, (5-9)     | white-British   | nil                                                               | not vaccinated                       | not known                             | sore gums, mouth ulcers, gottrons's papules, polyarthritis, fever, mild weakness on legs                      | 211 | negative | anti-Ro52                                          | MRI thighs with widespread patchy muscle oedema           | IV methylprednisolone, MMF, MTX              | no response      |
| Female, (70-74) | white-British   | amyopathic dermatomyositis anti-MDA5- but antiRo52 and Anti-iku + | 5 days after                         | 2 weeks before, Trigger?              | calcinosis, dermatomyositis cutaneous changes (not specified)                                                 | 174 | positive | anti-Ro52, anti-NPX2                               | MRI thigh normal, pulmonary function test normal          | oral steroids, MTX                           | stable           |
| Female, (10-14) | black-African   | Sjogren syndrome                                                  | not vaccinated                       | not known                             | synovitis, sicca syndrome, weak proximal limbs                                                                | 115 | positive | anti-Ro52 (was + in 2018, MDA5 was -)              | MRI compatible with myositis                              | MTX, MMP, HCO, rituximab                     | partial response |
| Female, (10-14) | not given       | nil                                                               | not vaccinated                       | not known                             | malaise, léthargie, joint pains, Raynaud                                                                      | 25  | negative | anti-PMScl75,                                      | none                                                      | none                                         | improvement      |

|                 |                     |                 |                            |                           |                                                                                                                    |     |          |                                |                                                         |                                                        |             |
|-----------------|---------------------|-----------------|----------------------------|---------------------------|--------------------------------------------------------------------------------------------------------------------|-----|----------|--------------------------------|---------------------------------------------------------|--------------------------------------------------------|-------------|
| Male, (85-89)   | white-British       | nil             | 8 months before            | not known                 | dysphagia                                                                                                          | n/a | positive | anti-Mi2-beta, anti-Mi-2-alpha | n/a                                                     | n/a                                                    | n/a         |
| Male, (50-54)   | white-British       | nil             | 7 months before            | not known                 | hyperkeratosis                                                                                                     | 38  | negative | none                           | n/a                                                     | n/a                                                    | died        |
| Female, (35-39) | white-black African | nil             | 4 months before            | 7 months before           | Raynaud's phenomenon with Dermatomyositis like skin rash, mechanic hands, inflammatory joint pain, chronic fatigue | 76  | positive | none                           | none                                                    | methylphenidate                                        | stable      |
| Female, (35-39) | white-British       | lupus           | 7 months before            | not known                 | Periungal inflammation, proximal weakness                                                                          | 221 | positive | anti-Ro52                      | n/a                                                     | MTX, HCQ, thalidomide, rituximab, iloprost, tacrolimus | no response |
| Female, (65-69) | white-British       | nil             | 8 months before            | 10 months after, no flare | Inflammatory arthritis, clubbing, oesophageal dysmotility, Raynaud                                                 | 29  | negative | none                           | Chest CT with no evidence of ILD, achalasia on chest CT | Rituximab, MTX, prednisolone, HCQ                      | no response |
| Male, (65-69)   | white-British       | nil             | 3 months after, no flare   | 1 month after, flared     | Mild proximal weakness, inflammatory arthritis, lymphopaenia                                                       | 350 | negative | anti-SAE1                      | none                                                    | MTX, prednisolone, nifedipine                          | improvement |
| Female, (40-44) | white-British       | nil             | 4 months before            | not known                 | Raynaud                                                                                                            | n/a | positive | none                           | n/a                                                     | n/a                                                    | n/a         |
| Male, (45-49)   | white-British       | nil             | 1 month before             | not known                 | inflammatory arthritis and weight loss                                                                             | n/a | positive | anti-SAE1                      | n/a                                                     | n/a                                                    | n/a         |
| Female, (35-39) | N/A                 | nil             | not vaccinated             | not known                 | Raynaud                                                                                                            | n/a | negative | none                           | n/a                                                     | n/a                                                    | n/a         |
| Female, (60-64) | N/A                 | nil             | 1 year and 4 months before | not known                 | Raynaud                                                                                                            | 76  | positive | anti-PMScl75, anti-NXP2,       | none                                                    | none                                                   | stable      |
| Female, (70-74) | any other Asian     | Hypothyroidism? | 1 year and 4 months before | not known                 | Myositis, myocardial involvement, toe                                                                              | 36  | negative | anti-Mi2-alpha                 | echo EF < 30%, MRI with myositis features (thigh)       | prednisolone, MMF, rituximab                           | stable      |

|                                                                                                                                                                                                                                                                                                                                                                                                                                     |                      |                     |                            |           |                                                                |        |          |                                                                                     |                                                                        |                      |             |
|-------------------------------------------------------------------------------------------------------------------------------------------------------------------------------------------------------------------------------------------------------------------------------------------------------------------------------------------------------------------------------------------------------------------------------------|----------------------|---------------------|----------------------------|-----------|----------------------------------------------------------------|--------|----------|-------------------------------------------------------------------------------------|------------------------------------------------------------------------|----------------------|-------------|
|                                                                                                                                                                                                                                                                                                                                                                                                                                     |                      |                     |                            |           | ulceration and Raynaud                                         |        |          |                                                                                     |                                                                        |                      |             |
| Female, (60-64)                                                                                                                                                                                                                                                                                                                                                                                                                     | white-British        | nil                 | 1 year and 4 months before | not known | Raynaud                                                        | 388    | positive | antiPL7                                                                             | normal EMG, normal chest CT, normal MRI thigh                          | none                 | improvement |
| Female, (25-29)                                                                                                                                                                                                                                                                                                                                                                                                                     | "other ethnic group" | crohn's disease, HS | not vaccinated             | not known | Raynaud, puffy fingers, pitting scars                          | 81     | positive | anti-PMScI75                                                                        | early scleroderma on capillaroscopy, normal pulmonary function         | nifedipine           | progression |
| Female, (45-49)                                                                                                                                                                                                                                                                                                                                                                                                                     | white-British        | nil                 | 1 year and 6 months before | not known | Raynaud                                                        | 121    | positive | none                                                                                | US of shoulder with degenerative changes                               | none                 | stable      |
| Female, (55-59)                                                                                                                                                                                                                                                                                                                                                                                                                     | white-British        | nil                 | 4 months before            | not known | MCTD symptoms                                                  | n/a    | positive | anti-mibeta2, anti-PMScI75                                                          | n/a                                                                    | n/a                  | n/a         |
| Male, (55-59)                                                                                                                                                                                                                                                                                                                                                                                                                       | n/a                  | nil                 | 1 year and 9 months before | not known | proximal myopathy, rashes, sicca syndrome, synovitis, Raynaud. | normal | positive | anti-RS, Anti-OJ, Anti-PL7, anti-EJ, Anti-Ku, Anti-NXP2, Anti-MRIFgamma2, Anti-Ro52 | n/a                                                                    | none                 | stable      |
| Female, (60-64)                                                                                                                                                                                                                                                                                                                                                                                                                     | black-Caribbean      | nil                 | 7 months before            | not known | myopathy, transient raised CK                                  | 1715   | positive | none                                                                                | no fatty atrophy or active myositis on imaging                         | observation/none     | improvement |
| Male, (60-64)                                                                                                                                                                                                                                                                                                                                                                                                                       | white-British        | nil                 | 1 month before             | not known | myositis                                                       | 11000  | negative | none                                                                                | myositis on MRI thighs biopsy suggestive of statin myositis HMGCoA Ab+ | prednisolone and MTX | improvement |
| Female, (80-84)                                                                                                                                                                                                                                                                                                                                                                                                                     | "other ethnic group" | PMR                 | 8 months before            | not known | myositis                                                       | 22000  | positive | OJ Ab, EJ Ab, MPL122, PL-7, Ku,MTIFG2                                               | CT with no ILD                                                         | none                 | improvement |
| Female, (75-79)                                                                                                                                                                                                                                                                                                                                                                                                                     | white-Irish          | nil                 | 10 months before           | not known | myositis and synovitis                                         | 55     | negative | none                                                                                | CT with no ILD                                                         | prednisone           | improvement |
| <b>ILD = Interstitial Lung Disease; CK = Creatin-Kinase; ANA IIF = Anti-Nuclear Antibodies Indirect Immunofluorescence; N/A = Not Available; CT = Computer Tomography scan; MRI = magnetic resonance imaging; US (ultrasound); IV = Intra-Venous; MMF = Mophetyl Mychophenolate; MTX = Methotrexate, HCQ = HydroxyChloroQuine; PPI = proton pump inhibitors; not known for COVID-19 infection status considered when not tested</b> |                      |                     |                            |           |                                                                |        |          |                                                                                     |                                                                        |                      |             |

663  
664
